# Supplementary material for: Enhanced photodegradation of dyes and mixed dyes by heterogeneous mesoporous Co–Fe/Al2O3–MCM-41 nanocomposites: nanoparticles formation, semiconductor behavior and mesoporosity
Source: Royal Society of Chemistry journal article supplement (doi:10.1039/c6ra19923b), 2016-01-01
Supplement: c6ra19923b1.pdf [file c6ra19923b1.pdf]

**Enhanced photo degradation of dyes and mixed dyes by heterogeneous mesoporous Co-Fe/Al<sub>2</sub>O<sub>3</sub>-MCM-41 nanocomposite: nanoparticles formation, semiconductor behaviour and mesoporosity**

Amaresh C. Pradhan<sup>1</sup>, Malaya K. Sahoo<sup>1</sup>, Sankeerthana Bellamkonda<sup>1</sup>, K. M. Parida\*<sup>2</sup> and G. Ranga Rao\*<sup>1</sup>

<sup>1</sup>Department of Chemistry, Indian Institute of Technology Madras, Chennai 600036, India

<sup>2</sup>Centre for Nano Science and Nano Technology, Institute of Technical Education and Research, Siksha 'O' Anusandhan University, Bhubaneswar-751030, India

E-mail: [grrao@iitm.ac.in](mailto:grrao@iitm.ac.in)

**Supporting Information**

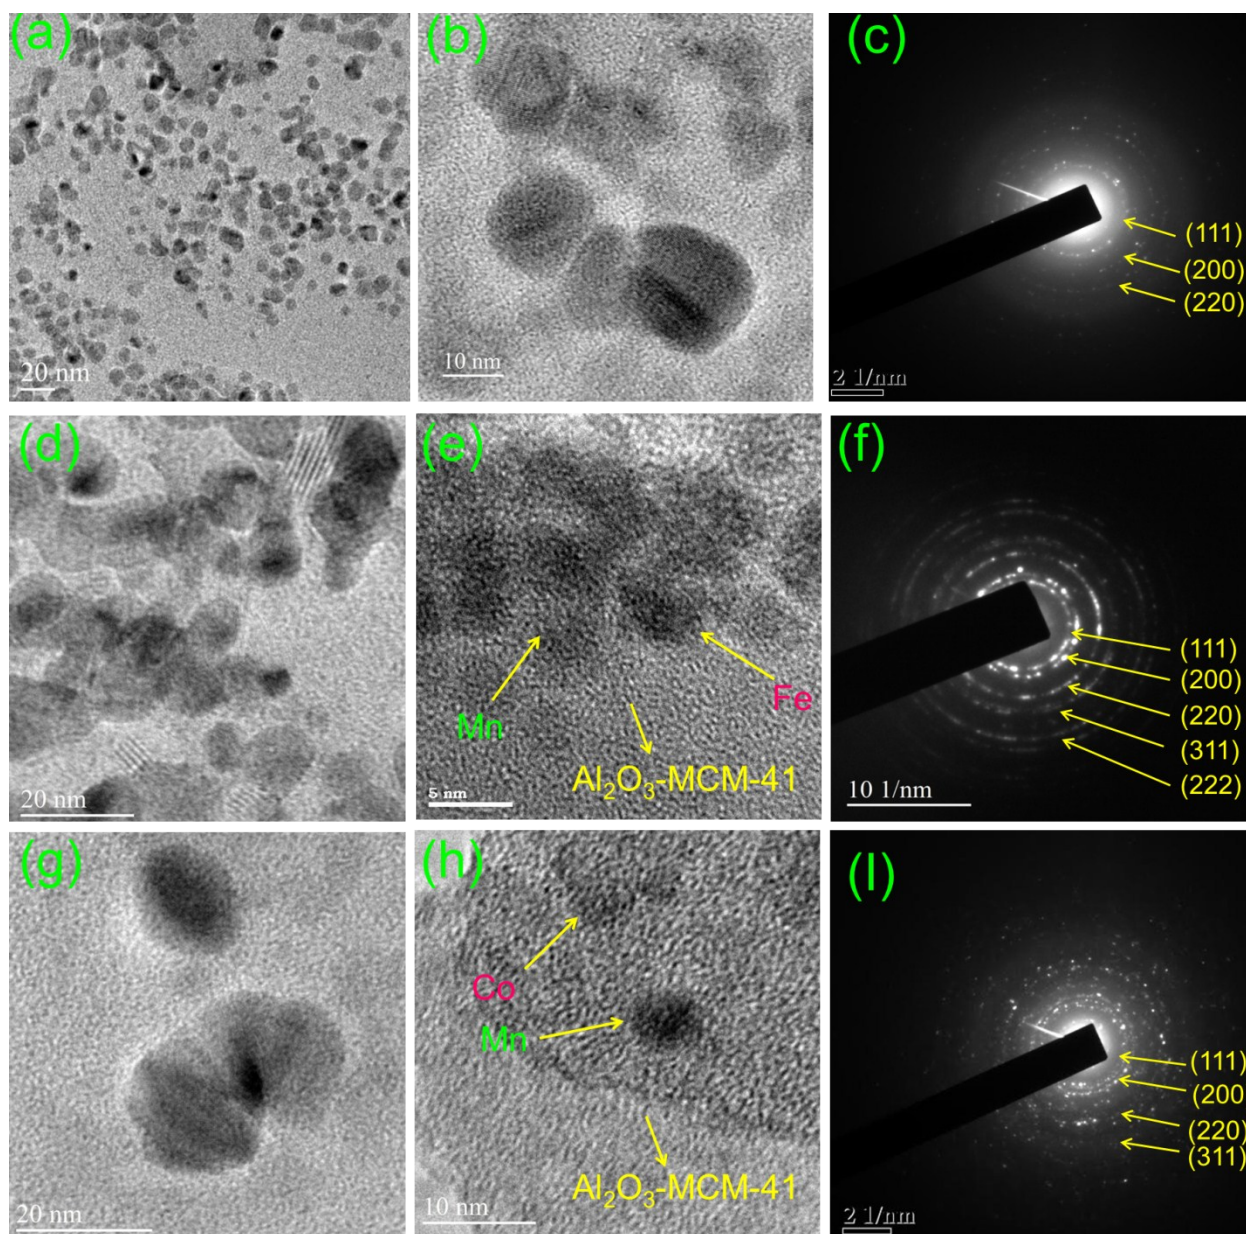

Figure S1 Characteristic micrographs of Mn/Al<sub>2</sub>O<sub>3</sub>-MCM-41 nanocomposite (a) TEM image, (b) HRTEM image and (c) SAED pattern. The Characteristic images of Fe-Mn/Al<sub>2</sub>O<sub>3</sub>-MCM-41 nanocomposite (d) TEM image, (e) HRTEM image and (f) SAED pattern. Representative micrographs of Mn-Co/Al<sub>2</sub>O<sub>3</sub>-MCM-41, (g) TEM image, (h) HRTEM image and (i) SAED pattern.
